# Supplementary material for: Facile synthesis of nanostructured perovskites by precursor accumulation on nanocarbons
Source: Royal Society of Chemistry journal article supplement (doi:10.1039/d1ra08357k), 2022-01-01
Supplement: d1ra08357k1.pdf [file d1ra08357k1.pdf]

*Electronic Supplementary Information*

**Facile Synthesis of Nanostructured Perovskites by  
Precursor Accumulation on Nanocarbons**

Mai Higuchi, Mizuri Yaguchi, Miru Yoshida-Hirahara, Hitoshi Ogihara\*, Hideki Kurokawa

Graduate School of Science and Engineering, Saitama University, 255 Shimo-Okubo, Sakura-ku,  
Saitama 338-8570, Japan

**Table S1** Preparation conditions of PA methods.

| A-site                                                                                      |                   | B-site                                                  |                   | solvent          | Carbon           | Drying temp. (°C) | Calcination temp. (°C) |
|---------------------------------------------------------------------------------------------|-------------------|---------------------------------------------------------|-------------------|------------------|------------------|-------------------|------------------------|
| precursor                                                                                   | concentration (M) | precursor                                               | concentration (M) |                  |                  |                   |                        |
| La(NO <sub>3</sub> ) <sub>3</sub> ·6H <sub>2</sub> O                                        | 0.15              | Mn(NO <sub>3</sub> ) <sub>2</sub> ·6H <sub>2</sub> O    | 0.15              | EtOH             | KB               | R.T.              | 600                    |
| La(NO <sub>3</sub> ) <sub>3</sub> ·6H <sub>2</sub> O                                        | 0.15              | Co(NO <sub>3</sub> ) <sub>2</sub> ·6H <sub>2</sub> O    | 0.15              | EtOH             | KB               | 130               | 600                    |
| La(NO <sub>3</sub> ) <sub>3</sub> ·6H <sub>2</sub> O                                        | 0.15              | Fe(NO <sub>3</sub> ) <sub>3</sub> ·9H <sub>2</sub> O    | 0.15              | EtOH             | KB               | 130               | 650                    |
| La(NO <sub>3</sub> ) <sub>3</sub> ·6H <sub>2</sub> O                                        | 0.15              | Ni(NO <sub>3</sub> ) <sub>2</sub> ·6H <sub>2</sub> O    | 0.15              | EtOH             | KB               | 130               | 750                    |
| La(NO <sub>3</sub> ) <sub>3</sub> ·6H <sub>2</sub> O                                        | 0.15              | Al(NO <sub>3</sub> ) <sub>3</sub> ·9H <sub>2</sub> O    | 0.15              | EtOH             | KB               | 130               | 800                    |
| La(NO <sub>3</sub> ) <sub>3</sub> ·6H <sub>2</sub> O                                        | 0.15              | Ga(NO <sub>3</sub> ) <sub>3</sub> ·nH <sub>2</sub> O    | 0.15              | EtOH             | KB               | 130               | 850                    |
| La(NO <sub>3</sub> ) <sub>3</sub> ·6H <sub>2</sub> O                                        | 0.15              | Cu(NO <sub>3</sub> ) <sub>2</sub> ·3H <sub>2</sub> O    | 0.075             | EtOH             | KB               | 130               | 700                    |
| Ca(CH <sub>3</sub> COO) <sub>2</sub> ·H <sub>2</sub> O                                      | 0.15              | Mn(CH <sub>3</sub> COO) <sub>2</sub> ·4H <sub>2</sub> O | 0.15              | H <sub>2</sub> O | KB <sup>a)</sup> | 130               | 850                    |
| Ca(NO <sub>3</sub> ) <sub>2</sub> ·4H <sub>2</sub> O                                        | 0.15              | Fe(NO <sub>3</sub> ) <sub>3</sub> ·9H <sub>2</sub> O    | 0.15              | EtOH             | KB               | 130               | 650                    |
| Ba(CH <sub>3</sub> COO) <sub>2</sub>                                                        | 0.15              | Mn(CH <sub>3</sub> COO) <sub>2</sub> ·4H <sub>2</sub> O | 0.15              | H <sub>2</sub> O | KB <sup>a)</sup> | 130               | 700                    |
| Sr(CH <sub>3</sub> COO) <sub>2</sub> ·0.5H <sub>2</sub> O                                   | 0.15              | Mn(CH <sub>3</sub> COO) <sub>2</sub> ·4H <sub>2</sub> O | 0.15              | H <sub>2</sub> O | KB <sup>a)</sup> | 130               | 700                    |
| La(NO <sub>3</sub> ) <sub>3</sub> ·6H <sub>2</sub> O<br>+ Sr(NO <sub>3</sub> ) <sub>2</sub> | 0.105<br>0.045    | Fe(NO <sub>3</sub> ) <sub>3</sub> ·9H <sub>2</sub> O    | 0.15              | H <sub>2</sub> O | KB <sup>a)</sup> | 130               | 650                    |
| La(NO <sub>3</sub> ) <sub>3</sub> ·6H <sub>2</sub> O                                        | 0.15              | Mn(NO <sub>3</sub> ) <sub>2</sub> ·6H <sub>2</sub> O    | 0.15              | EtOH             | CNF              | R.T.              | 650                    |
| La(NO <sub>3</sub> ) <sub>3</sub> ·6H <sub>2</sub> O                                        | 0.15              | Fe(NO <sub>3</sub> ) <sub>3</sub> ·9H <sub>2</sub> O    | 0.15              | EtOH             | CNF              | R.T.              | 650                    |
| La(NO <sub>3</sub> ) <sub>3</sub> ·6H <sub>2</sub> O                                        | 0.15              | Ni(NO <sub>3</sub> ) <sub>2</sub> ·6H <sub>2</sub> O    | 0.15              | EtOH             | CNF              | 130               | 750                    |
| La(NO <sub>3</sub> ) <sub>3</sub> ·6H <sub>2</sub> O                                        | 0.15              | Al(NO <sub>3</sub> ) <sub>3</sub> ·9H <sub>2</sub> O    | 0.15              | EtOH             | CNF              | 130               | 800                    |
| La(NO <sub>3</sub> ) <sub>3</sub> ·6H <sub>2</sub> O                                        | 0.15              | Cu(NO <sub>3</sub> ) <sub>2</sub> ·3H <sub>2</sub> O    | 0.075             | EtOH             | CNF              | 130               | 700                    |
| Ca(NO <sub>3</sub> ) <sub>2</sub> ·4H <sub>2</sub> O                                        | 0.15              | Fe(NO <sub>3</sub> ) <sub>3</sub> ·9H <sub>2</sub> O    | 0.15              | EtOH             | CNF              | 130               | 650                    |
| La(NO <sub>3</sub> ) <sub>3</sub> ·6H <sub>2</sub> O                                        | 0.15              | Mn(NO <sub>3</sub> ) <sub>2</sub> ·6H <sub>2</sub> O    | 0.15              | EtOH             | KB               | R.T.              | 520~560                |
| La(NO <sub>3</sub> ) <sub>3</sub> ·6H <sub>2</sub> O                                        | 0.15              | -                                                       | -                 | EtOH             | KB               | R.T.              | 520                    |
| -                                                                                           | -                 | Mn(NO <sub>3</sub> ) <sub>2</sub> ·6H <sub>2</sub> O    | 0.15              | EtOH             | KB               | R.T.              | 520                    |
| La(NO <sub>3</sub> ) <sub>3</sub> ·6H <sub>2</sub> O                                        | 0.15              | Mn(NO <sub>3</sub> ) <sub>2</sub> ·6H <sub>2</sub> O    | 0.15              | EtOH             | absent           | R.T.              | 650                    |
| La(NO <sub>3</sub> ) <sub>3</sub> ·6H <sub>2</sub> O                                        | 0.15              | Fe(NO <sub>3</sub> ) <sub>3</sub> ·9H <sub>2</sub> O    | 0.15              | EtOH             | absent           | R.T.              | 650                    |
| La(NO <sub>3</sub> ) <sub>3</sub> ·6H <sub>2</sub> O                                        | 0.15              | Ni(NO <sub>3</sub> ) <sub>2</sub> ·6H <sub>2</sub> O    | 0.15              | EtOH             | absent           | R.T.              | 650                    |
| Sr(CH <sub>3</sub> COO) <sub>2</sub> ·0.5H <sub>2</sub> O                                   | 0.15              | Mn(NO <sub>3</sub> ) <sub>2</sub> ·6H <sub>2</sub> O    | 0.15              | H <sub>2</sub> O | absent           | R.T.              | 650                    |
| Ba(CH <sub>3</sub> COO) <sub>2</sub>                                                        | 0.15              | Mn(NO <sub>3</sub> ) <sub>2</sub> ·6H <sub>2</sub> O    | 0.15              | H <sub>2</sub> O | absent           | R.T.              | 650                    |

<sup>a)</sup> KB was calcined at 773 K for 4 h to enhance the wettability of KB to water.

**Table S2** Comparison of specific surface area of perovskites prepared by the PA method to previous studies.

| Perovskites                                          | Specific surface area ( $\text{m}^2\text{g}^{-1}$ ) | Preparation method                                  | Reference |
|------------------------------------------------------|-----------------------------------------------------|-----------------------------------------------------|-----------|
| LaFeO <sub>3</sub>                                   | 36                                                  | PA method                                           | this work |
| LaFeO <sub>3</sub>                                   | 26                                                  | Sol-gel auto-combustion method                      | [1]       |
| LaFeO <sub>3</sub>                                   | 15                                                  | Combustion synthesis method                         | [2]       |
| LaNiO <sub>3</sub>                                   | 7                                                   | PA method                                           | this work |
| LaNiO <sub>3</sub>                                   | 15                                                  | Sol-gel combustion technique.                       | [3]       |
| LaNiO <sub>3</sub>                                   | 7                                                   | Citrate method                                      | [4]       |
| La <sub>2</sub> CuO <sub>4</sub>                     | 4                                                   | PA method                                           | this work |
| La <sub>2</sub> CuO <sub>4</sub>                     | 46                                                  | PMMA templating and citric acid complexing method   | [5]       |
| LaAlO <sub>3</sub>                                   | 24                                                  | PA method                                           | this work |
| LaAlO <sub>3</sub>                                   | 21                                                  | Pyrolysis of complex compounds with triethanolamine | [6]       |
| LaGaO <sub>3</sub>                                   | 4                                                   | PA method                                           | this work |
| LaGaO <sub>3</sub>                                   | 2                                                   | Pechini method                                      | [7]       |
| La <sub>0.7</sub> Sr <sub>0.3</sub> FeO <sub>3</sub> | 33                                                  | PA method                                           | this work |
| La <sub>0.7</sub> Sr <sub>0.3</sub> FeO <sub>3</sub> | 7                                                   | Pechini method                                      | [8]       |
| CaMnO <sub>3</sub>                                   | 5                                                   | PA method                                           | this work |
| CaMnO <sub>3</sub>                                   | 32                                                  | Citric acid assisted sol-gel method                 | [9]       |
| Ca <sub>2</sub> Fe <sub>2</sub> O <sub>5</sub>       | 32                                                  | PA method                                           | this work |
| Ca <sub>2</sub> Fe <sub>2</sub> O <sub>5</sub>       | 60                                                  | Citric acid assisted sol-gel method                 | [10]      |
| BaMnO <sub>3</sub>                                   | 9                                                   | PA method                                           | this work |
| BaMnO <sub>3</sub>                                   | 2                                                   | Sol-gel method using glycol and citric acid         | [11]      |
| SrMnO <sub>3</sub>                                   | 10                                                  | PA method                                           | this work |
| SrMnO <sub>3</sub>                                   | 2                                                   | Sol-gel self-combustion method                      | [12]      |

[1] Parida, K. M.; Reddy, K. H.; Martha, S.; Das, D. P.; Biswal, N., Fabrication of nanocrystalline LaFeO<sub>3</sub>: An efficient sol-gel auto-combustion assisted visible light responsive. *Int. J. Hydrog. Energy*. **2010**, *35*, 12161-12168.

[2] Fino, D.; Russo, N.; Saracco, G.; Speccchia, V., The role of suprafacial oxygen in some perovskites for the catalytic combustion of soot. *J. Catal.* **2003**, *217*, 367-375.

[3] Li, Y. Y.; Yao, S. S.; Wen, W.; Xue, L. H.; Yan, Y. W., Sol-gel combustion synthesis and visible-light-driven photocatalytic property of perovskite LaNiO<sub>3</sub>. *J. Alloy Compd.* **2010**, *491*, 560-564.

[4] Rivas, M. E.; Fierro, J. L. G.; Guil-Lopez, R.; Pena, M. A.; La Parola, V.; Goldwasser, M. R., Preparation and characterization of nickel-based mixed-oxides and their performance for catalytic methane decomposition. *Catal. Today* **2008**, *133*, 367-373.

[5] Yuan, J.; Dai, H. X.; Zhang, L.; Deng, J. G.; Liu, Y. X.; Zhang, H.; Jiang, H. Y.; He, H., PMMA-templating preparation and catalytic properties of high-surface-area three-dimensional macroporous La<sub>2</sub>CuO<sub>4</sub> for methane combustion. *Catal. Today* **2011**, *175*, 209-215.

[6] Ran, S.; Gao, L., Synthesis of LaAlO<sub>3</sub> powder using triethanolamine. *Ceram. Int.* **2008**, *34*, 443-446.

- [7] Kumar, M.; Srikanth, S.; Ravikumar, B.; Alex, T. C.; Das, S. K., Synthesis of pure and Sr-doped LaGaO<sub>3</sub>, LaFeO<sub>3</sub> and LaCoO<sub>3</sub> and SrMg-doped LaGaO<sub>3</sub> for ITSOFC application using different wet chemical routes. *Mater. Chem. Phys.* **2009**, *113*, 803-815.
- [8] Zhang, R. J.; Cao, Y.; Li, H. B.; Zhao, Z. L.; Zhao, K.; Jiang, L. Q., The role of CuO modified La<sub>0.7</sub>Sr<sub>0.3</sub>FeO<sub>3</sub> perovskite on intermediate-temperature partial oxidation of methane via chemical looping scheme. *Int. J. Hydrog. Energy* **2020**, *45*, 4073-4083
- [9] Han, X. P.; Hu, Y. X.; Yang, J. G.; Cheng, F. Y.; Chen, J., Porous perovskite CaMnO<sub>3</sub> as an electrocatalyst for rechargeable Li-O<sub>2</sub> batteries. *Chem. Commun.* **2014**, *50*, 1497-1499.
- [10] Sun, Z.; Chen, S. Y.; Hu, J.; Chen, A. M.; Rony, A. H.; Russell, C. K.; Xiang, W. G.; Fan, M. H.; Dyar, M. D.; Dklute, E. C., Ca<sub>2</sub>Fe<sub>2</sub>O<sub>5</sub>: A promising oxygen carrier for CO/CH<sub>4</sub> conversion and almost-pure H<sub>2</sub> production with inherent CO<sub>2</sub> capture over a two-step chemical looping hydrogen generation process. *Appl. Energy* **2018**, *211*, 431-442.
- [11] Xu, W. T.; Shi, N.; You, Z. M.; Cai, J. J.; Peng, K.; Su, Z. M.; Zhou, J. C., Low-temperature NO decomposition through microwave catalysis on BaMnO<sub>3</sub>-based catalysts under excess oxygen: Effect of A-site substitution by Ca, K and La. *Fuel Process. Technol.* **2017**, *167*, 205-214.
- [12] Rezlescu, N.; Rezlescu, E.; Popa, P. D.; Doroftei, C. L.; Ignat, M., Some nanograined ferrites and perovskites for catalytic combustion of acetone at low temperature. *Ceram. Int.* **2015**, *41*, 4430-4437.

**Table S3** Physicochemical properties of the perovskites using CNFs. Crystallite sizes were evaluated from XRD patterns using Scherrer's equation.

| perovskite                                     | Crystallite size (nm) | Specific surface area ( $\text{m}^2 \text{g}^{-1}$ ) |
|------------------------------------------------|-----------------------|------------------------------------------------------|
| LaMnO <sub>3</sub>                             | 14                    | 21                                                   |
| LaFeO <sub>3</sub>                             | 20                    | 39                                                   |
| LaNiO <sub>3</sub>                             | 16                    | 6                                                    |
| LaAlO <sub>3</sub>                             | 32                    | 11                                                   |
| La <sub>2</sub> CuO <sub>4</sub>               | 58                    | 2                                                    |
| Ca <sub>2</sub> Fe <sub>2</sub> O <sub>5</sub> | 31                    | 25                                                   |

**Table S4** Comparison for specific surface area of samples prepared with or without nanocarbons.

|         | Specific surface area ( $\text{m}^2 \text{g}^{-1}$ ) |         |
|---------|------------------------------------------------------|---------|
|         | without C                                            | with KB |
| La + Mn | 16                                                   | 44      |
| La + Fe | 8                                                    | 36      |
| La + Ni | 5                                                    | 7       |
| Sr + Mn | 9                                                    | 10      |
| Ba + Mn | 5                                                    | 9       |

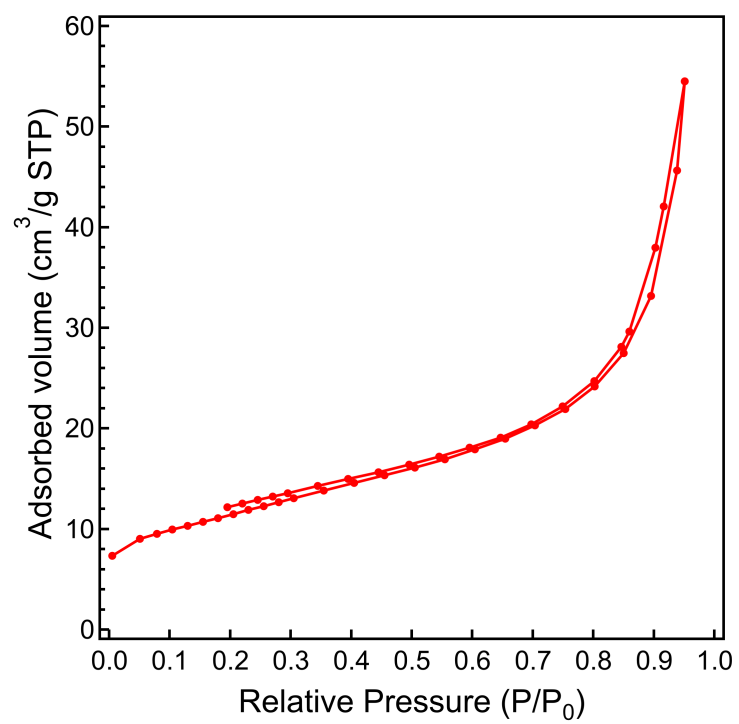

**Fig. S1** Nitrogen adsorption/desorption isotherm for LaMnO<sub>3</sub>.

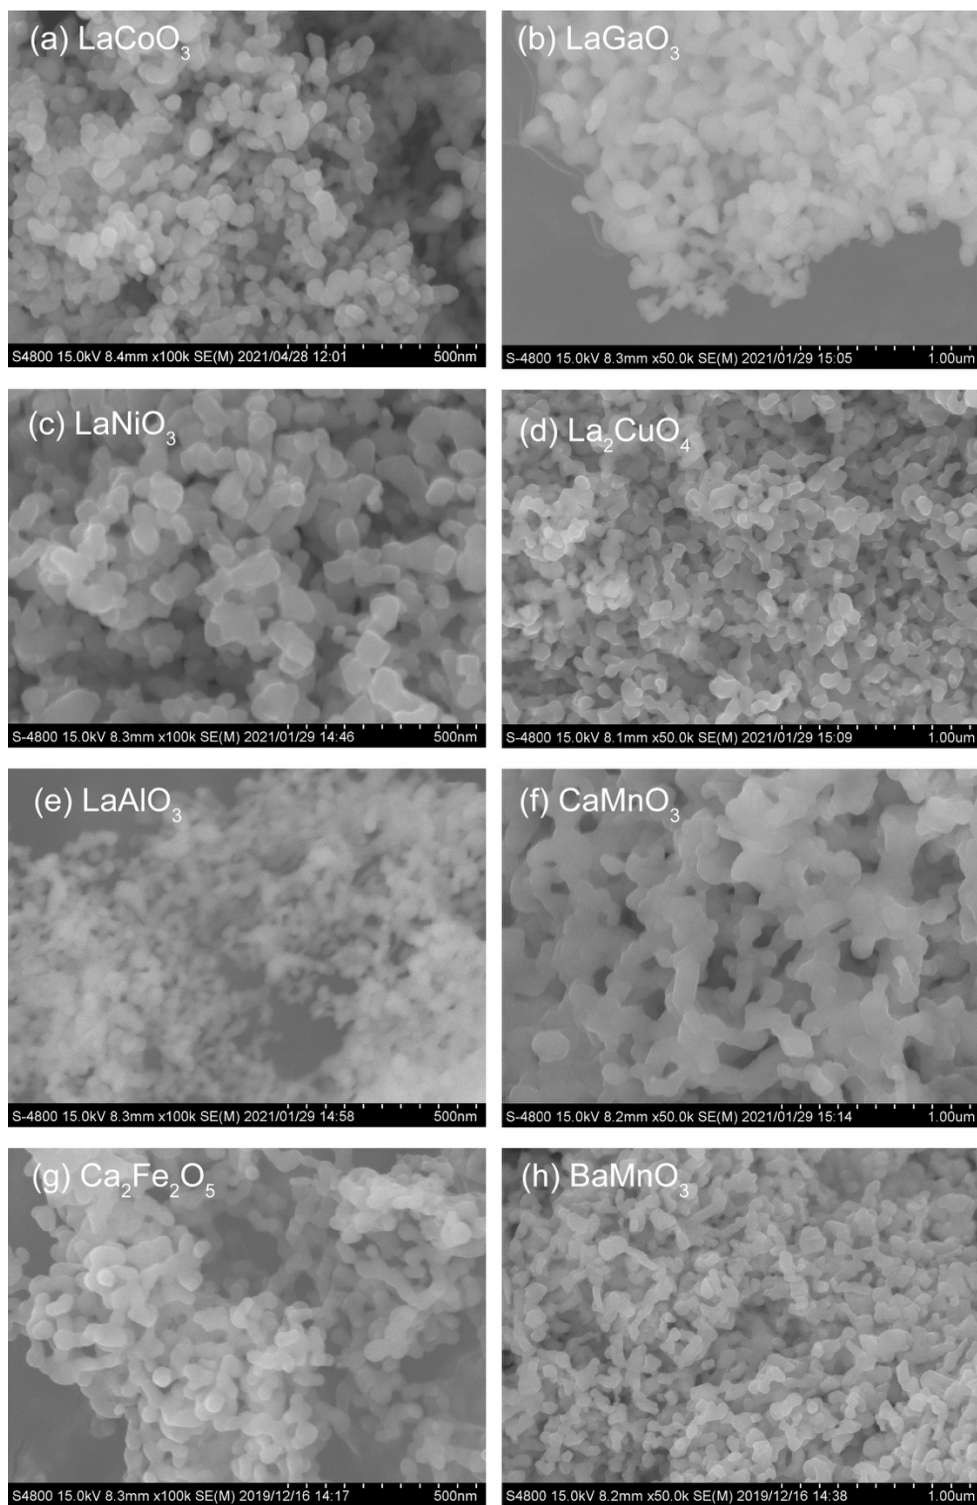

**Fig. S2** SEM images of perovskites formed by the PA method using KB as carbon sources.

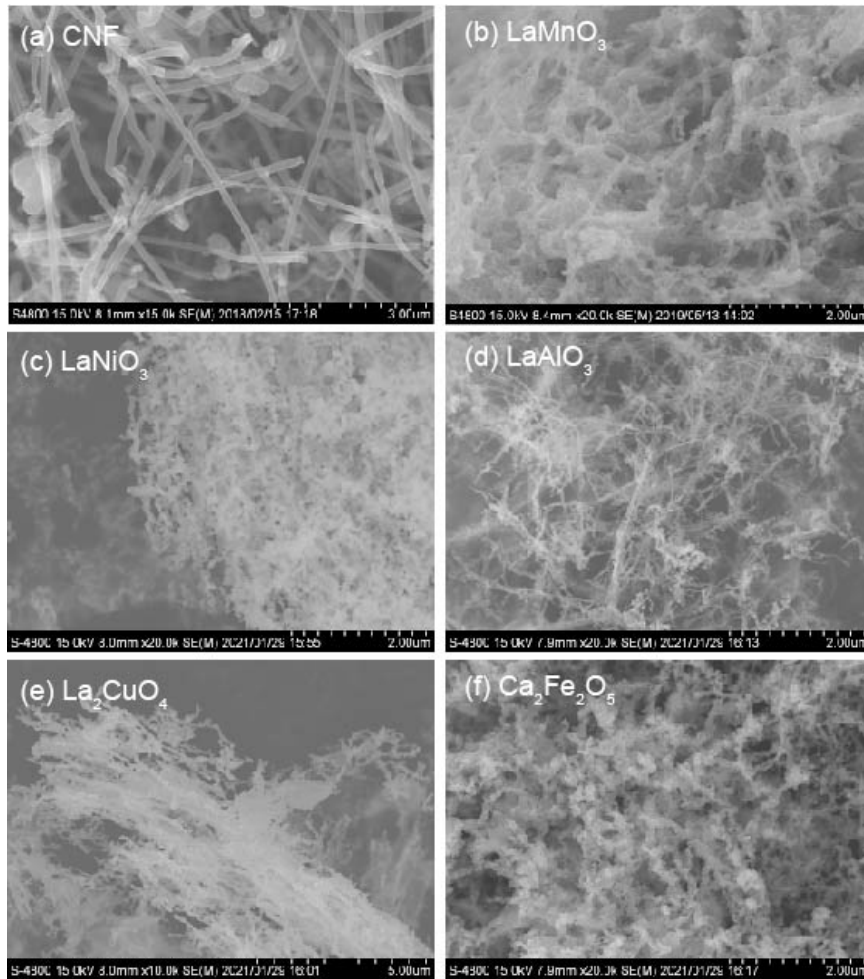

**Fig. S3** SEM images of (a) CNFs and (b-f) perovskites formed by the PA method using CNFs as carbon sources.



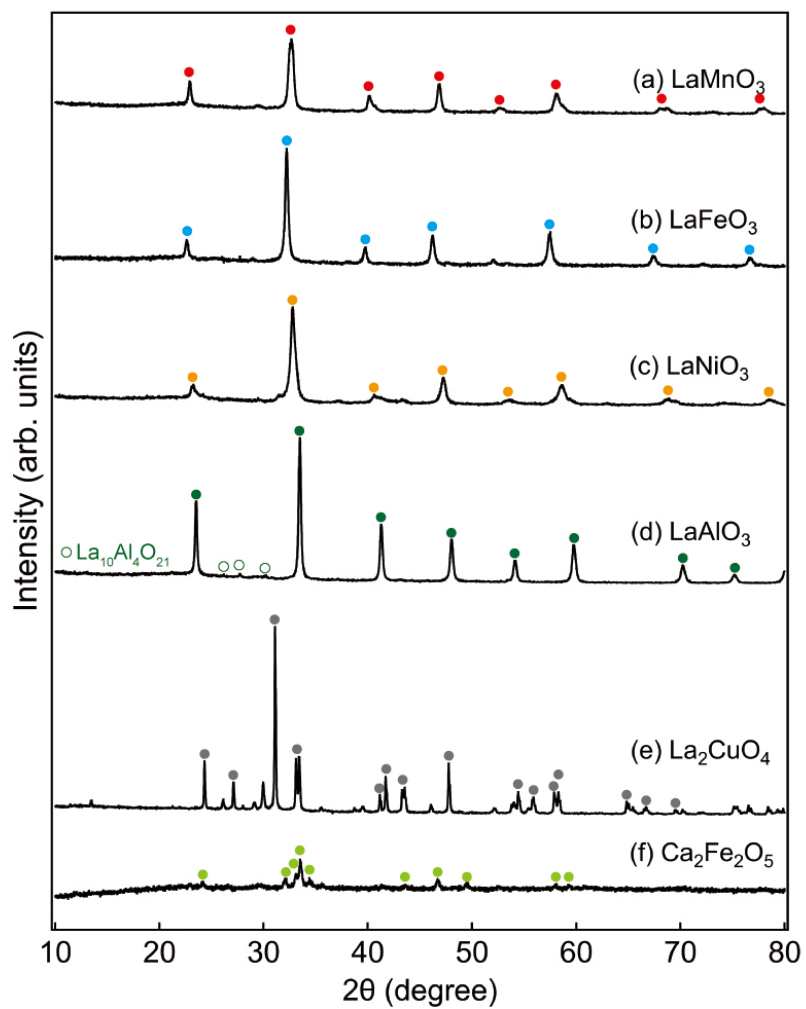

**Fig. S4** XRD patterns of perovskites formed by the PA method using CNFs as carbon sources.

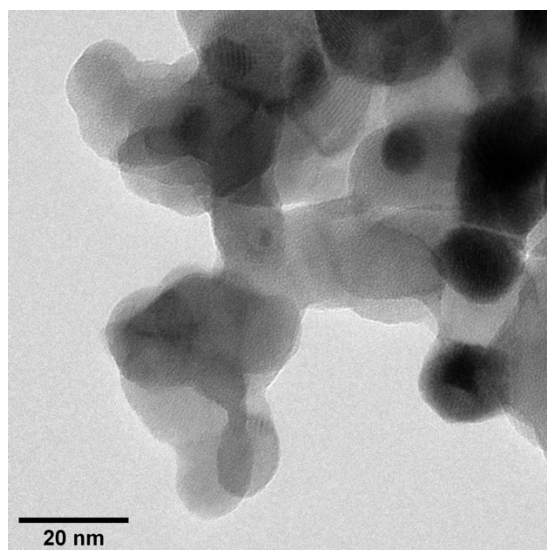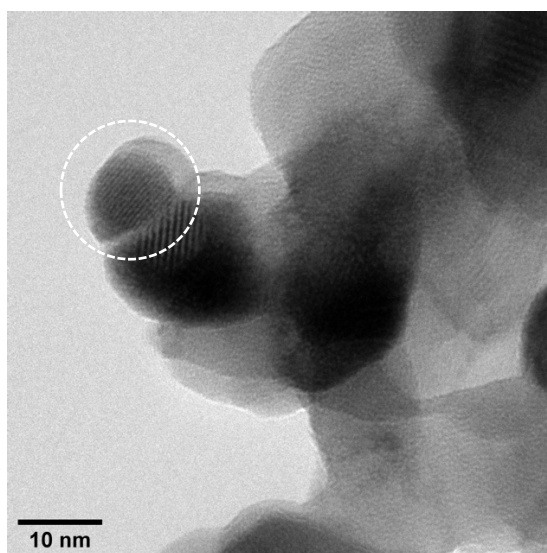

**Fig. S5** TEM images of LaMnO<sub>3</sub>. Concentration of La(NO<sub>3</sub>)<sub>3</sub>·6H<sub>2</sub>O and Mn(NO<sub>3</sub>)<sub>2</sub>·6H<sub>2</sub>O: 0.01 M, solvent: ethanol, carbon: KB, drying temp.: 403 K, calcination temp.: 873 K.

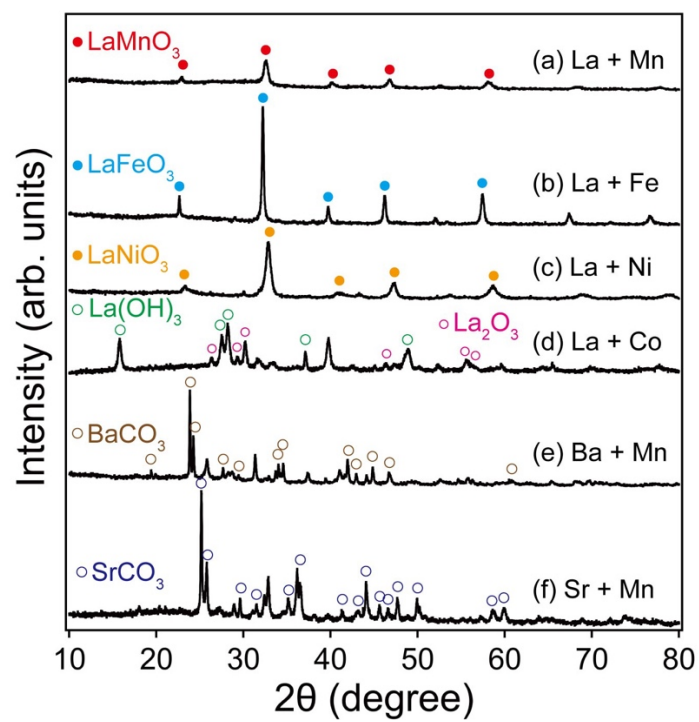

**Fig. S6** XRD patterns of the samples prepared by the calcination of metal salts without carbons.

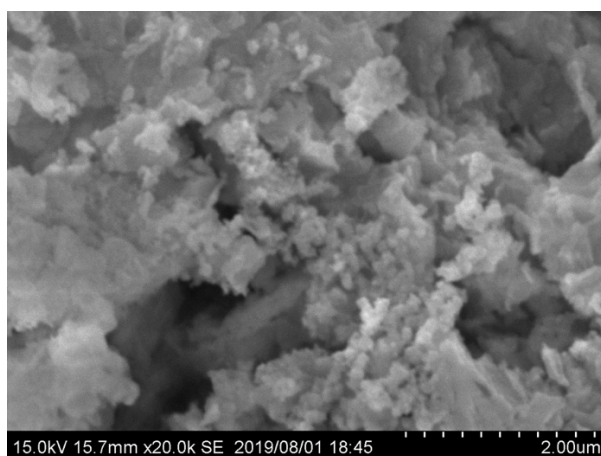

**Fig. S7** SEM image of La/Mn sample prepared without carbons. The preparation condition was described in the experimental section.

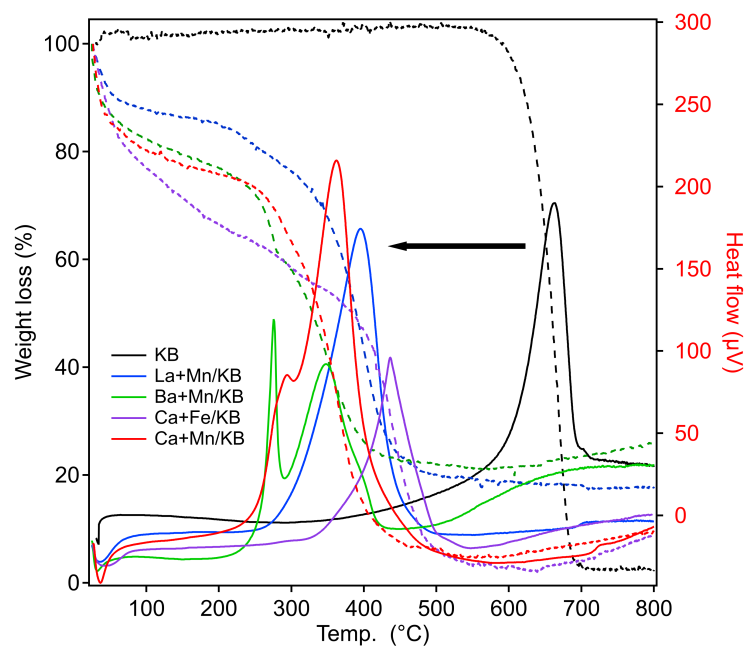

Fig. S8 TG/DTA profile of KB and KB accumulated with precursors.

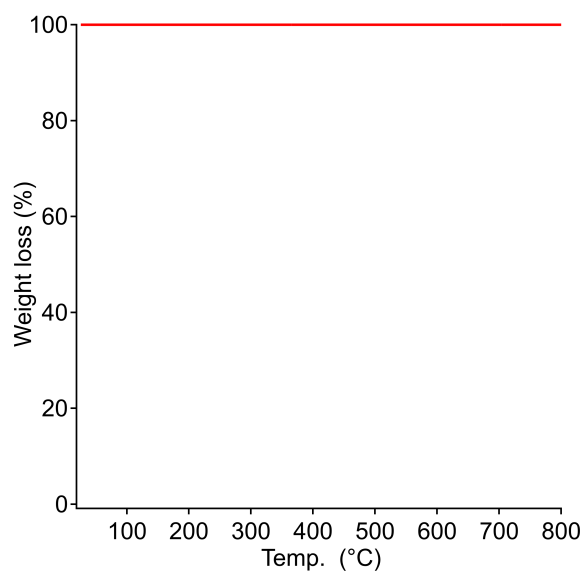

Fig. S9 TG profile of  $\text{LaMnO}_3$  prepared by the calcination at 793 K.
